# Supplementary material for: PARP-1 selectively impairs KRAS -driven phenotypic and molecular features in intrahepatic cholangiocarcinoma
Source: HighWire-hosted journal article supplement (doi:10.1136/gutjnl-2023-331237), 2024-06-10
Supplement: gutjnl-2023-331237supp005_data_supplement.pdf [file gutjnl-2023-331237supp005_data_supplement.pdf]

# PARP1 selectively impairs KRAS-driven phenotypic and molecular features in intrahepatic cholangiocarcinoma

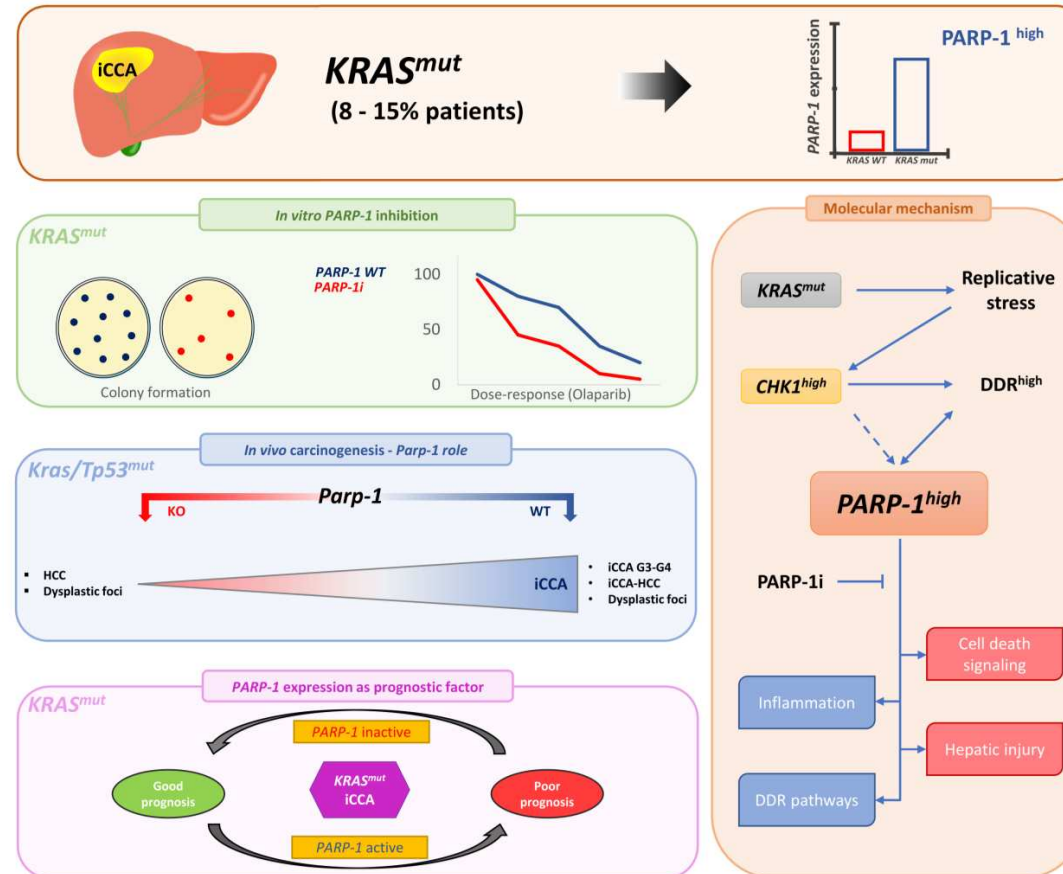

Keggenhoff FL, et al. *Gut* 2024. DOI: 10.1136/gut-2023-331237.R1
